# Supplementary material
Source: PubMed Central journal article supplement (PMC2904346)
Supplement: NIHMS206512-supplement-01.pdf [file NIHMS206512-supplement-01.pdf]

## Supplemental Information

### INVENTORY OF SUPPLEMENTARY INFORMATION

Supplementary experimental procedures  
 Supplementary figure S1, related to figure1  
 Supplementary figure S2, related to figure2  
 Supplementary figure S3, related to figure4  
 Supplementary figure S4, related to figure5  
 Supplementary figure S5, related to figure6  
 Supplementary figure S6, related to figure7  
 Supplementary movie S1, related to figure6  
 Supplementary movie S2, related to figure6  
 Supplementary table S1, related to figure2  
 Supplementary table S2, related to figure2  
 Supplementary references

### SUPPLEMENTARY EXPERIMENTAL PROCEDURES

#### DNA Construction

Pax6 and its mutants were constructed into pLenti vector with a FUGW backbone and an inducible lentiviral vector (Clontech) (Xia et al., 2008; Xia and Zhang, 2007; Xia et al., 2007). Primers for amplifying Pax6a (1-422) and Pax6b (1-436) are as follows: Forward, CATATTCGAGCCCCGTGGAATCC; Reverse, TTAGTGTAATCTTGCCAGTATTG. Forward primer for amplifying Pax6  $\Delta$ PAI (77-422) is ATGAGAGTAGCGACTCCAGAAGTTG and forward primer for Pax6  $\Delta$ PD (202-422) is ATGCGACTTCAGCTGAAGCGG. For deleting HD in Pax6 (delete 210-269 in Pax6a and 224-283 in Pax6b) two step PCR is used with two additional primers: Forward, CGACTTCAGCTGAAGCGGAAGAACTGAGGAATCAGAGA; Reverse, GTCTTCTCTGATTCTCAGTTTCTTCCGCTTCAGCTGAAGTCG. For subcloning Pax6 dominant negative mutants (D/N), the last 78 amino acids of the PST transactivation domain are removed by the reverse primer, TTGCATAGGCAGGTTATTTGC. All the constructs have been verified by DNA sequencing.

#### Lentivirus production and transduction of ESCs.

The constructs of lentiviral vectors for knockdown of Pax6 are shown in supplementary Figure 2 and lentivirus production was described previously (Xia et al., 2008). For transduction of ESCs, human H9 ESCs or mouse ESCs (D3 and 46C) were collected by brief centrifugation. Cell pellets were then incubated with 100 $\mu$ l of concentrated virus ( $10^6$  transducing units/ml) at 37°C for 30 min. The virus and cell mixture was then transferred to the MEF feeder layer overnight before changing medium on the next day. Forty-eight hours after infection, blasticidin or puromycin was added to the cells for

selecting drug-resistant clones. The final concentration of blasticidin or puromycin was 5µg/ml for elongation factor-1 α (EF1α) promoter and 2µg/ml for phosphoglycerate kinase (PGK) promoter. To make stable transduced monoclonal RNAi lines, ESCs were pretreated with ROCK inhibitor and then trypsinized to single cells before plating on the MEF feeder (Watanabe et al., 2007).

The inducible lentivirus system, purchased from Clontech (Mountain View, CA), was modified by replacing the CMV promoter driving rtTA-Advanced in the pLVX-Tet-On Advanced vector with the EF1α promoter to optimize transgene expression in human ESCs.

### Western blotting

Cell pellets were lysed in a lysis buffer (1% Nonidet P-40, 50 mM Tris-HCl, pH 8.0, 0.5% sodium deoxycholate, 150 mM NaCl, 5 mM EDTA, with 10 mM NaF, 10 mM disodium pyrophosphate, and 1X protease inhibitor cocktail, Sigma) and passed through a 28<sup>1/2</sup> gauge needle several times. The particulate fraction was removed by centrifugation, and 30 µg of proteins in the supernatant were boiled in SDS-PAGE sample buffer and separated by SDS-PAGE.

### Microarray analysis

Luc RNAi and Pax6 RNAi human ESC lines were differentiated to NE cells for 6 days. Total RNA was extracted using Trizol (Invitrogen) and mRNA pooled from two individual lines of each group was hybridized on Affymetrix GeneChip Human Genome HG-U133 Plus 2.0 arrays according to the manufacturer's instructions. The data were deposited in the ArrayExpress database (accession number E-MEXP-2668).

### mRNA extraction and RT-PCR

Total RNA was isolated using the Trizol kit (Invitrogen). 1 µg of total RNA from each sample was reverse transcribed into cDNA and subjected to real-time PCR using the Power SYBR Green kit (Applied Biosystems, UK). Primer oligonucleotides used for real-time PCR were as follows (most primers target both human and mouse genes except when they are specifically labeled):

| Gene         | Forward Primer             | Reverse Primer            |
|--------------|----------------------------|---------------------------|
| Pax6         | TCTTTGCTTGGGAAATCCG        | CTGCCCGTTCAACATCCTTAG     |
| Oct4(human)  | ACATCAAAGCTCTGCAGAAAGAAGCT | CTGAATACCTTCCCAAATAGAACCC |
| Oct4 (mouse) | ACATGAAAGCCCTGCAGAAGGAGCT  | GAGAACGCCAGGGTGAGCC       |
| Nanog        | ATTCTTCCACCAGTCCCAA        | ATCTGCTGGAGGCTGAGGTA      |
| Sox2         | GCCCTGCAGTACAACCTCCAT      | TGGAGTGGGAGGAAGAGGTA      |
| Fabp7        | TGTGACCAAACCAACGGTAAT      | CTTTGCCATCCCATTTCTGTGA    |
| Lhx2         | TTACGGCAGGAAAACACGG        | TGCCAGGCACAGAAGTTAAG      |
| Six3         | ACTACCAGGAGGCCGAGAAG       | CAGTTCGCGTTTCTTGCTG       |
| Six6         | AACAAGAATGAGTCGGTGCT       | CAGCGGGAACCTTCTTCCTTA     |
| Map2         | GGTCACAGGGCACCTATTCA       | TGTTACCTTTCAGGACTGC       |
| Lmo3         | AAGGCACTGGACAAATACTGG      | CACGCATCACCATCTCAAAG      |
| Lix1         | GGAATTTTGGGAAAGCAAGC       | CAGCACTGAAAGTTGCCAAA      |

|                   |                          |                          |
|-------------------|--------------------------|--------------------------|
| Dlk1              | TCCTGAAGGTGTCCATGAAAG    | GTGGTTGTAGCGCAGGTTG      |
| Meis2             | CCAGGGGACTACGTTTCTCA     | TAACATTGTGGGGCTCTGTG     |
| Dach1             | GGTGGTGTGCAATGTGGA       | ATGCGGCATGATGTGAGAG      |
| N-Cad             | TCCTGATATATGCCCAAGACAA   | TGACCCAGTCTCTCTTCTGC     |
| Sox1              | GTTTTTTGTAGTTGTTACCGC    | GCATTTACAAGAAATAATAC     |
| Nedd9             | CCCATCCAGATACCAAAAGG     | TCTCTCCCCTGGAAGTAA       |
| Nr2f2             | AAGCACTACGGCCAGTTCAC     | GTCTCATGCCCACTTTGAGG     |
| Fezf2             | CGGCGAGAAGCAGTACAAAT     | GTTTGCGCACATGTTTCTTT     |
| Zic1              | AGCCACGATGCTCCTGGACGC    | TGGCCCAGGGCCGCAGCAGC     |
| Meis1             | GATGATTCAAGCCATACAAG     | GGGGTTCTCTCTGAACGAGT     |
| Mash1             | AACGAGCGCGAGCGCAACCG     | TTGGAGTAGTTGGGGGAGATG    |
| Pax3              | GCTGTGCCAGGATGATGC       | CTGGTACCTGCACAGGATCT     |
| Lmo1              | ACGGAGCGCCGAGATGATG      | GGCACAGGATGAGGTTGGCC     |
| Pou3f2            | CCGCAGCGTCTAACCCTAC      | GTGGGACAGCGCGGTGATCC     |
| Crx(human)        | TATTCTGTCAACGCCTTGGCCCTA | TGCATTTAGCCCTCCGGTTCTTGA |
| RPE65(human)      | GCCCTCCTGCACAAGTTTGACTTT | AGTTGGTCTCTGTGCAAGCGTAGT |
| Chx10(human)      | ATTCAACGAAGCCCACTACCCAGA | ATCCTTGGCTGACTTGAGGATGGA |
| FoxG1(human)      | AGAAGAACGGCAAGTACGAGA    | TGTTGAGGGACAGATTGTGGC    |
| En1(human)        | GGACAATGACGTTGAAACGCAGCA | AAGGTCGTAAGCGGTTTGGCTAGA |
| Hoxb4             | AAAGAGCCCCTCGTCTACC      | GTGTAGGCGGTCCGAGAG       |
| Nkx2.1(human)     | AACCAAGCGCATCCAATCTCAAGG | TGTGCCCAGAGTGAAGTTTGGTCT |
| Cdx2              | TGGAGCTGGAGAAGGAGTTT     | CTGCTGCTGCTGTTGCTG       |
| Gata6             | GTGAACTGCGGCTCCATC       | GTGTGACAGTTGGCACAGGA     |
| K18               | ATGCGCCAGTCTGTGGAG       | CCTGAGATTTGGGGGCATC      |
| Lama3             | TGTTAATCGGGCAACACAAA     | GGTGTCTTCCAAAGTTCCTG     |
| Brachyury (human) | ACAGCCAGCAACCTGGGTA      | CATGCAGGTGAGTTGTCAGAA    |
| Sox17             | ATACGCCAGTGACGACCAG      | GCGGCCGGTACTTGTAGTT      |
| Hnf1b             | AGAGGGAGGTGGTTCGATGTC    | AGCTGATCCTGACTGCTTTTG    |
| Pdx1              | CAAAGCTCACGCGTGGAAAG     | TGATGTGTCTCTCGGTCAAG     |
| Vegfr2            | TAGAAGGTGCCAGGAAAAG      | CAAGTAGCCTGTCTTCAGTTC    |
| Gapdh             | GAAGGTGAAGGTCCGAGTC      | GAAGATGGTGTGATGGGATTC    |

For separating Pax6a and Pax6b, primer sets spanning exon5a (Forward: CGGAGTGAATCAGCTCGGTG; Reverse: CCGCTTATACTGGGCTATTTTGC) were used for regular PCR and analyzed by 2.5% gel.

### Chromatin immunoprecipitation (ChIP)

Inducible GFP, Pax6a-GFP and Pax6b-GFP human ESC lines were treated with 2 $\mu$ g/ml doxycycline for 1 or 3 days to induce transgene expression. After cross-linking with 1% formaldehyde at 37°C for 10 min, the cells were harvested by scraping. The fixed cells were then washed and prepared with the EZ-ChIP™ kit according to the manufacturer's suggestions (Millipore). The chromatin was sheared by sonication and incubated with GFP antibody (Chemicon, rabbit IgG). The immunoprecipitates were then washed 5 times, crosslinks were reversed and immunoprecipitated DNA was subjected to qRT-PCR

analysis. Primer pairs against promoter regions of the pluripotent and NE genes were as follows:

| Targets | Forward Primer          | Reverse Primer       |
|---------|-------------------------|----------------------|
| Oct4    | ACCAGGCCCCATAATCTACC    | TTCCCCCACTCTTATGTTGC |
| Nanog   | GGGGGATACTCGGGATACTC    | GGAAAAGCAGGGTGACATTC |
| Fabp7   | CGGACATACTTCTGACTTTTTGG | GATGCTCTGTGGCAAGATGA |
| Six3    | ACGGCTGTCTCTGGCTAAGT    | GGGAAACCTAACGTGACTGG |
| Lmo3    | CCAGCGAGGGGTAACAGAT     | CAGCCAATGCACTGAGAAGA |
| Meis2   | GCCAAACTGAGGCTCTTCAA    | CCCCCTTTCCTGGTAGGTAT |
| Dach1   | GTGGAAAACACCCCTCAGAA    | CTTGTTCCACATTGCACACC |
| N-Cad   | AAAAGCCTAGCCAGCAACAG    | GCTTTTCTGCTTTGGGTGAC |

### Immunostaining

Antibodies used in this study for immunostaining were Pax6 (1:5,000, mouse IgG, Developmental Studies Hybridoma Bank), Sox1 (1:1,000, goat IgG, R&D), Otx2 (1:2,000, goat IgG, R&D), FoxG1(1:1,500; gift from Dr. Y. Sasai), Sox2 (1:1,000, goat IgG, R&D), Fabp7 (1:1,000, rabbit IgG, Chemicon), N-cadherin (1:1,000, mouse IgG, Santa Cruz Biotechnology), Brachyury (1:50, goat IgG, R&D), AFP (1:500, rabbit IgG, NeoMarkers) and Gata6 (1:500, rabbit IgG, Santa Cruz Biotechnology).

### Proliferation Analysis

Proliferation of Pax6 knockdown lines or Pax6 overexpression lines was assessed using a “Click-iT EdU” kit purchased from Invitrogen according to the manufacturer’s instructions (Weick et al., 2009). For Luc RNAi and Pax6 RNAi lines, cells were differentiated for 8 days and 10 $\mu$ M EdU was added to the cells and allowed for 6 hours of incorporation before fixation and EdU detection. For inducible overexpression lines, cells were treated with doxycycline for 1, 2 and 3 days. The cells were then labeled with EdU for another 6 hours in the presence of doxycycline.

### Cell Cycle Analysis

Cells were trypsinized into single cells and fixed in 75% ethanol/PBS overnight. Cells were then washed with PBS and stained with propidium iodide solution (3.8 mM sodium citrate, 50  $\mu$ g/ml propidium iodide, 0.5  $\mu$ g/ml RNase A) for 3 hours before analyzed by flow cytometry.

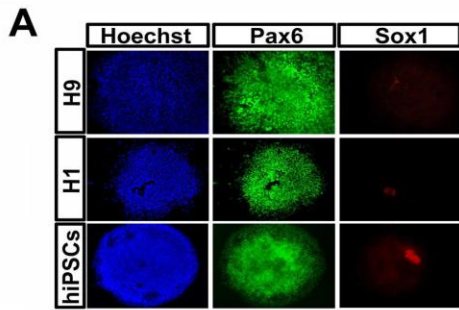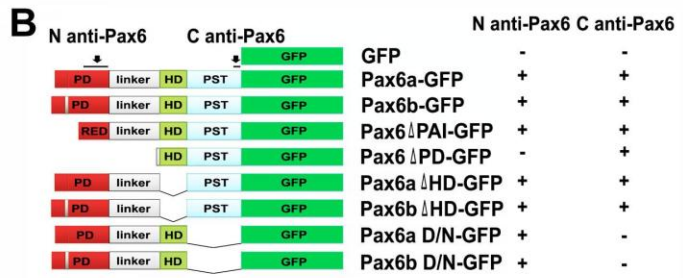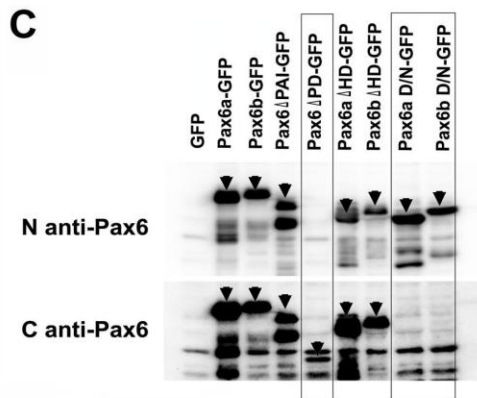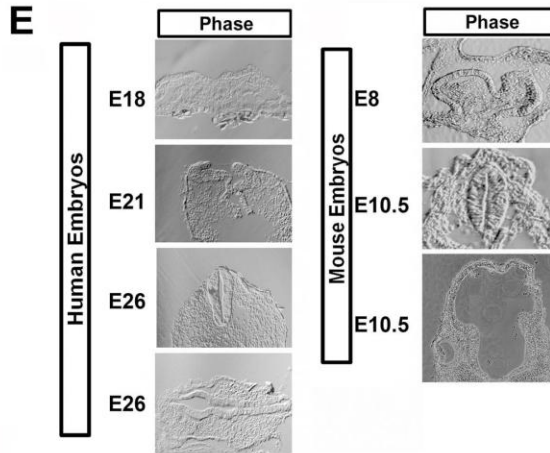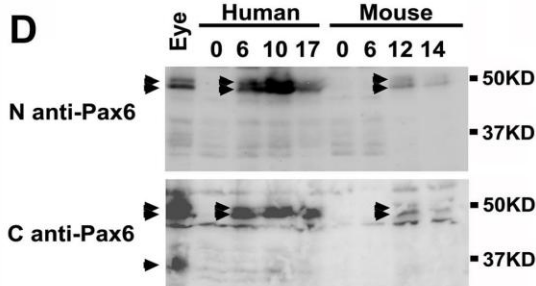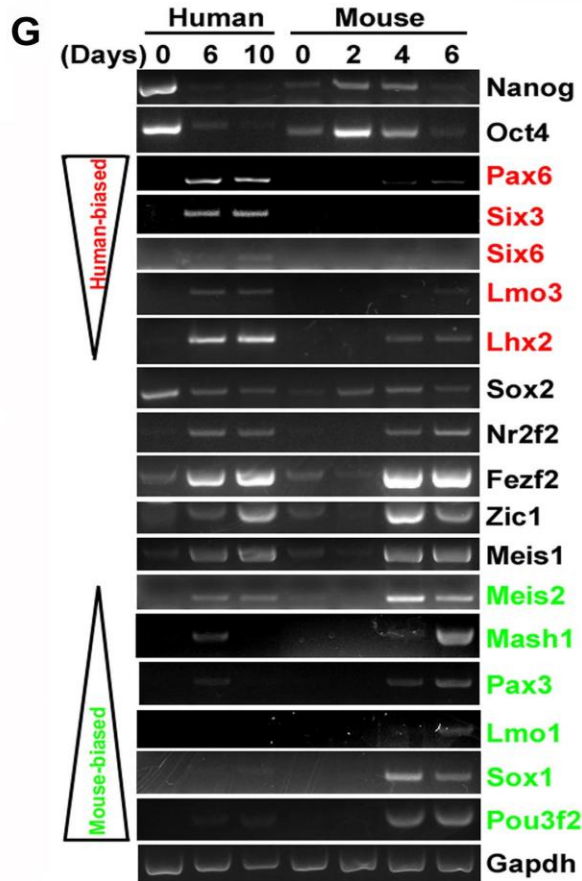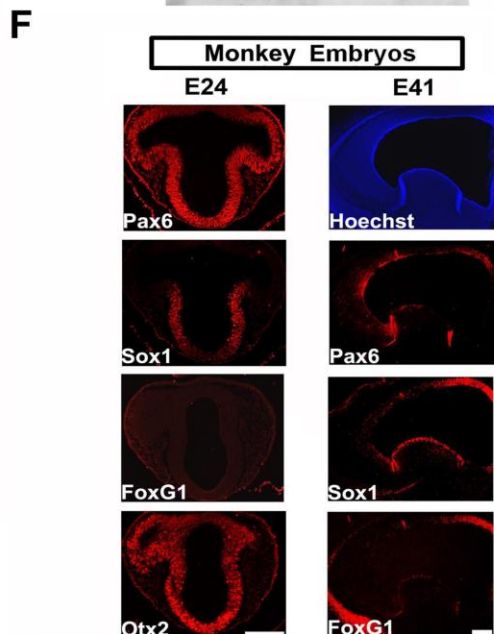

**Figure S1.** Pax6a and Pax6b, but not Pax6 $\Delta$ PD, are expressed in early human NE, Related to Figure 1.

(A) H9 hESCs, H1 hESCs and human induced pluripotent stem cells are differentiated to primitive NE cells for 8 days, which are Pax6<sup>+</sup>/Sox1<sup>-</sup>.

(B) Schematic representation of Pax6 isoforms and mutant constructs for the present study. Pax6a has two DNA binding domains, the paired domain (PD) and homeodomain (HD), and a proline-serine-threonine (PST)-rich transactivation domain. Pax6b has an extra exon5a inserted within the PD and is 14 amino acids longer than Pax6a. The third isoform of Pax6 (Pax6 $\Delta$ PD) lacks the entire paired domain. Monoclonal mouse anti-Pax6 (DSHB) recognizes RED subunit of the paired domain and rabbit anti-Pax6 (Covance) recognizes the most C-terminus of Pax6.

(C) The expression of Pax6 isoforms and mutants are verified using the above antibodies after transfection of these constructs into HEK293 cells. The rabbit C-terminal antibody can distinguish all three isoforms of Pax6.

(D) While eye tissues from newborn mice have all the three Pax6 isoforms (arrowheads), NE differentiated from human and mouse ESCs mainly express Pax6a and Pax6b but not Pax6 $\Delta$ PD.

(E) Phase contrast images of human and mouse fetal tissues presented in Figure 1.

(F) Expression of Otx2, Pax6, Sox1 and FoxG1 in early monkey embryos. At E24, Pax6 and Otx2 are expressed throughout the neural tube (cross section), whereas Sox1 is restricted to part of the neuroepithelia and FoxG1 is not expressed. At E41, Pax6, Sox1, and FoxG1 are expressed in the ventricular zone of the forebrain (sagittal section). Scale bars, 100  $\mu$ m.

(G) Comparison of gene expression profiles between human and mouse NE. Gene profiles were compared between our human NE microarray data (Lavaute et al., 2009; Li et al., 2009; Pankratz et al., 2007) and previously reported mouse NE microarray data (Aiba et al., 2006). These two sets of databases were chosen because the culture condition and time course are comparable. We then confirmed the expression of the most highly expressed genes using primer sets that target both human and mouse genes. *Pax6*, *Six3*, *Six6* and *Lmo3* are mainly expressed in human NE, while *Pax3*, *Lmo1*, *Sox1* and *Pou3f2* are predominant in mouse NE, suggesting differential use of transcriptional networks underlying NE specification in these two species.

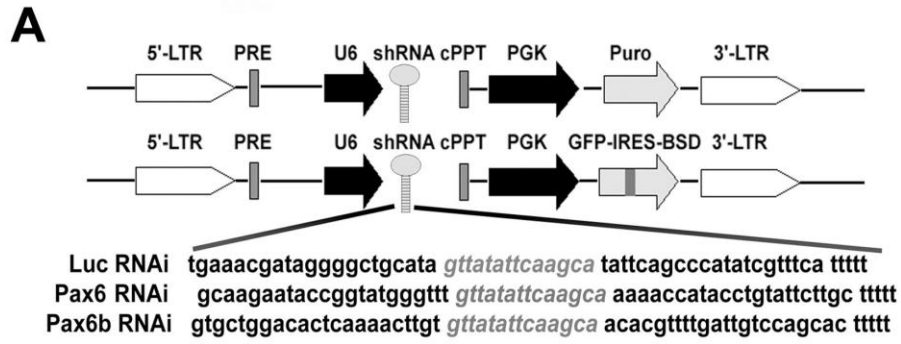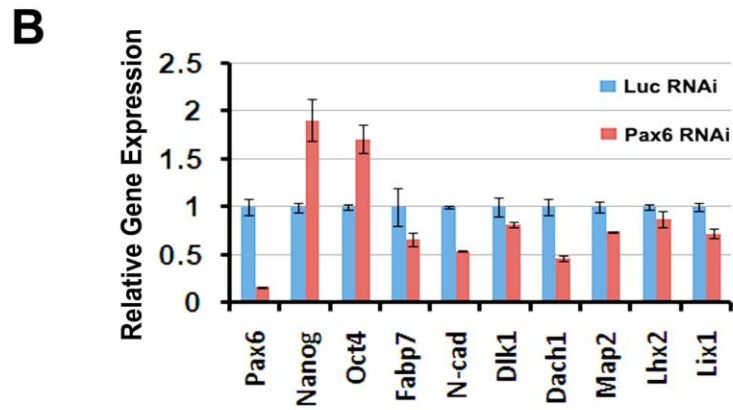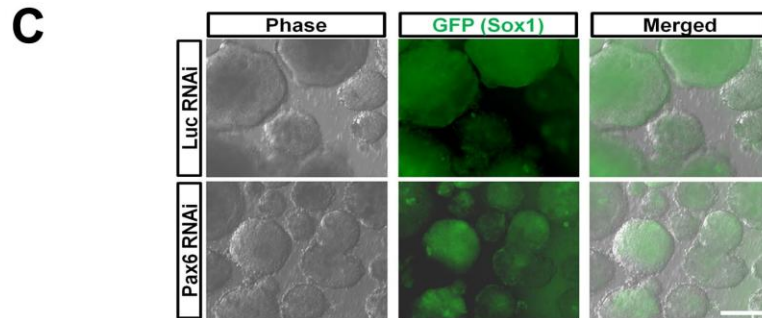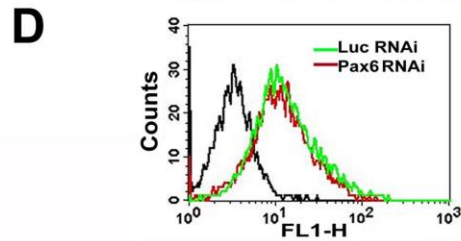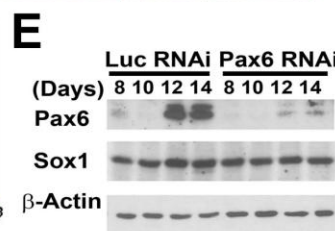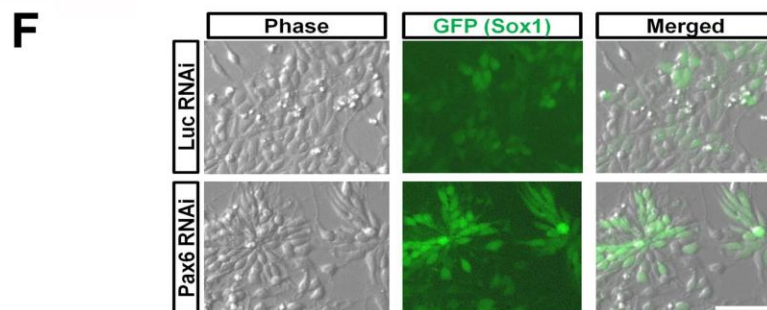

**Figure S2.** Knockdown of Pax6 blocks NE specification in human but not mouse ESCs, Related to Figure 2.

(A) Schematic representation of lentiviral backbone of the vectors for RNAi knockdown of all isoforms of Pax6 or Pax6b in human and mouse ESCs. RNAi is driven by the U6 promoter, whereas the antibiotics-resistant genes and GFP are driven by the PGK promoter.

(B) Pax6 is also required for dual SMAD inhibition-mediated NE specification. Luc RNAi and Pax6 RNAi lines were grown on matrigel. Noggin (500ng/ml) and SB431542 (10 $\mu$ M) were added in the culture medium for 4 days to induce a neural fate (Chambers et al., 2009). Pluripotent genes and NE genes were analyzed by qRT-PCR.

(C) Knockdown of Pax6 in mouse ESCs does not affect neural induction. The Sox1/GFP reporter line (46C) infected with luciferase or Pax6 RNAi lentivirus (no GFP) is differentiated toward the neural lineage for 8 days. GFP expression, indicative of neural differentiation, is observed under the fluorescent microscope.

(D) GFP expression in mouse Sox1/GFP reporter lines is quantified by flow cytometry.

(E) Western blotting analysis verifies the knockdown of Pax6 and no change of endogenous Sox1 expression during mouse D3 line neural differentiation.

(F) Healthy neurons are generated from both the control and Pax6 knockdown mouse ESC groups at day 14. Scale bars, 50  $\mu$ m.



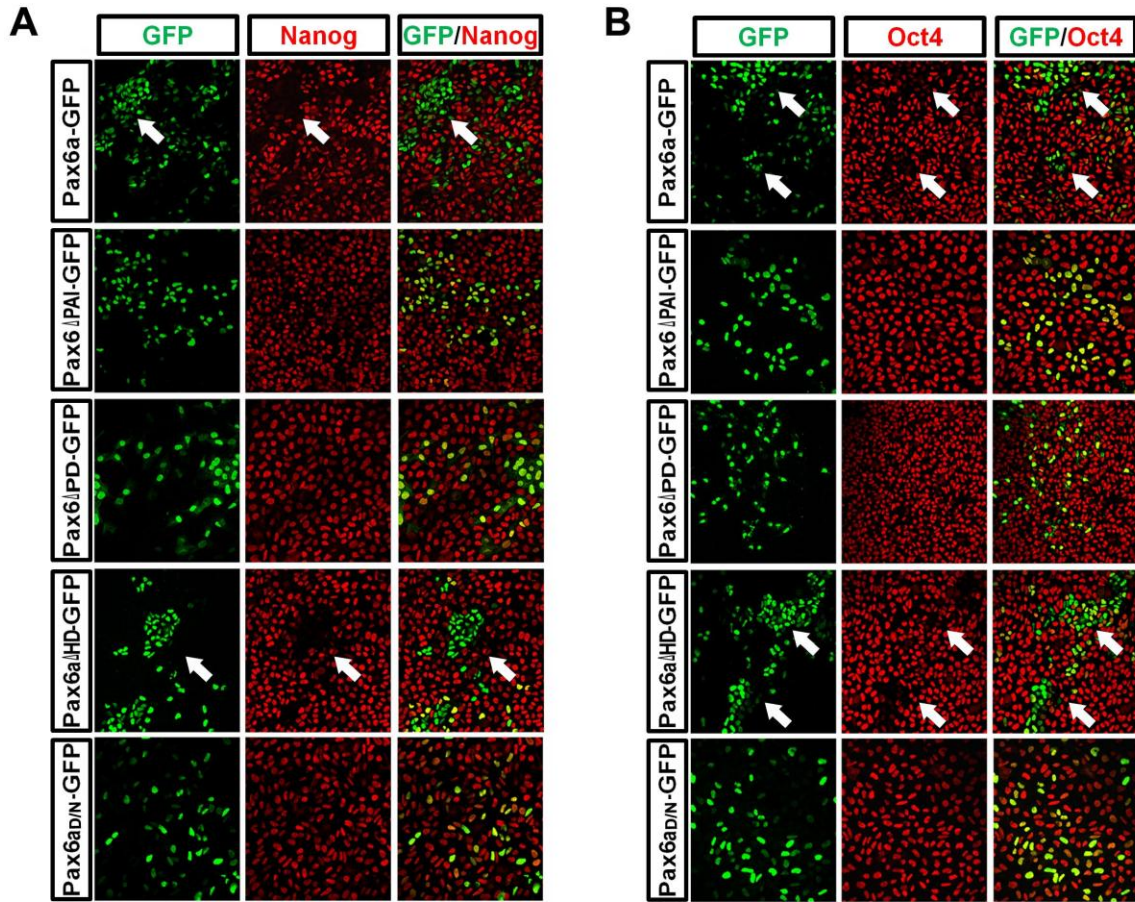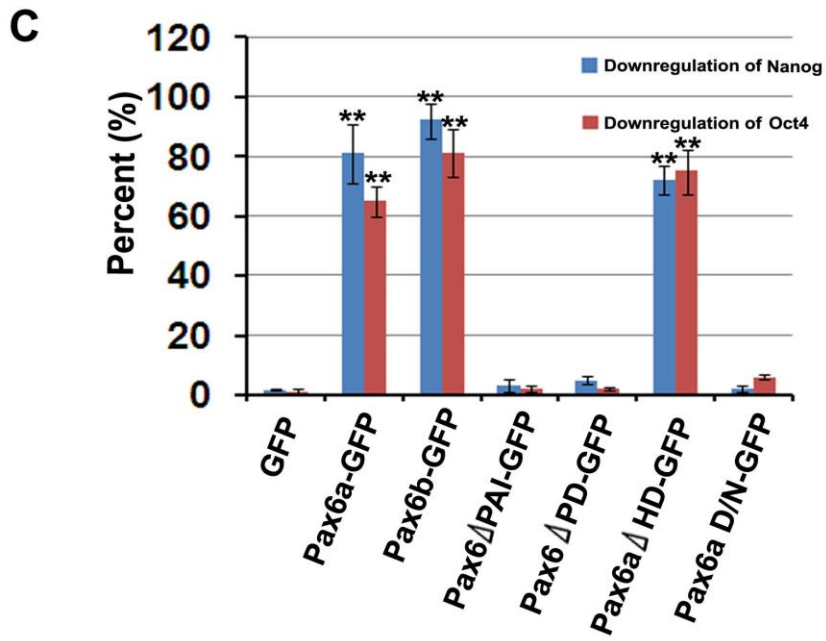

**Figure S3.** PD and PST transactivation domains, but not HD, are required for Pax6 NE inducing activity, Related to Figure 4.

(A) Nanog expression in hESCs with overexpression of wild type and mutant Pax6.

(B) Oct4 expression in hESCs with overexpression of wild type and mutant Pax6.

(C) Percentage of cells with Nanog or Oct4 downregulation among overall Pax6 overexpressing cells (GFP positive). Removal of PAI, PD or PST transactivation domain all abrogates the ability of Pax6a to downregulate Nanog and Oct4. Deletion of the entire HD within Pax6a does not affect Pax6a in differentiating hESCs and Pax6a $\Delta$ HD-expressing cells also aggregate to form neural rosettes. \*\*,  $p < 0.01$  vs GFP control.

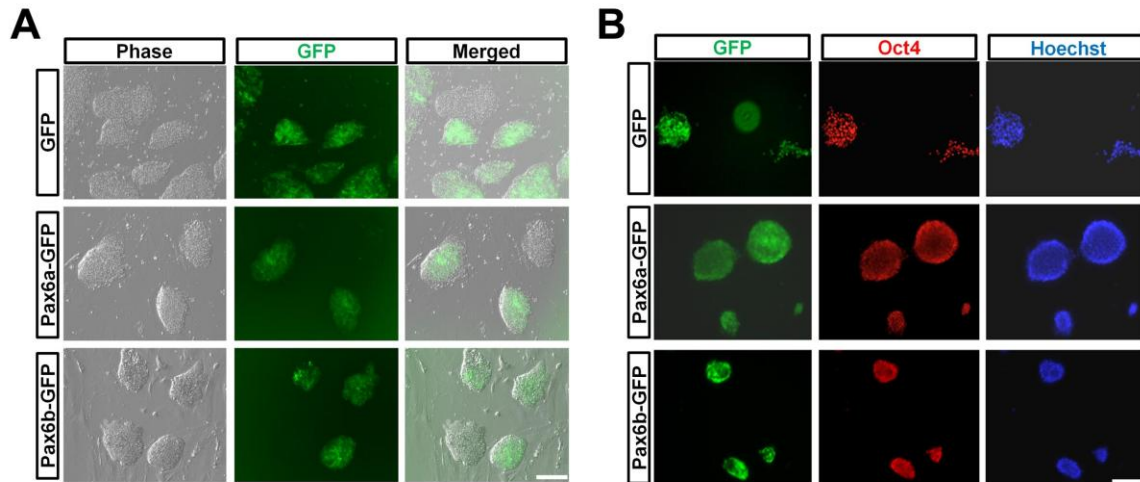

**Figure S4.** Overexpression of Pax6 in mouse ESCs does not cause differentiation, Related to Figure 5.

(A) Mouse ESCs express GFP, Pax6a-GFP, or Pax6b-GFP retain the typical ESC morphology and the same growth rate.

(B) Overexpression of GFP, Pax6a-GFP, or Pax6b-GFP in mouse ESCs does not alter Oct4 expression in the ESC colonies. Scale bars, 50  $\mu\text{m}$ .

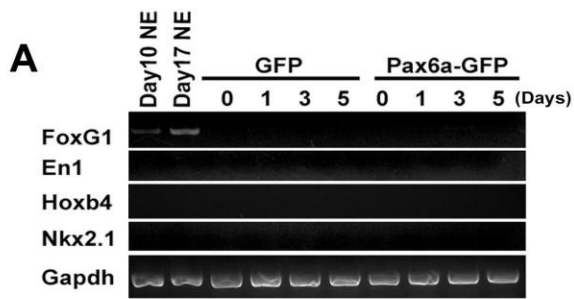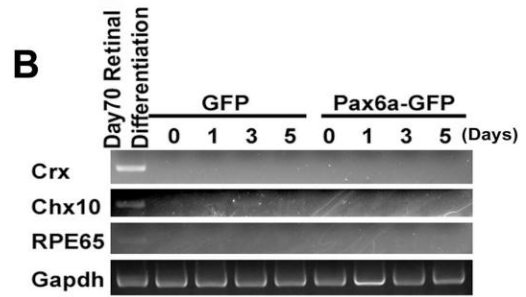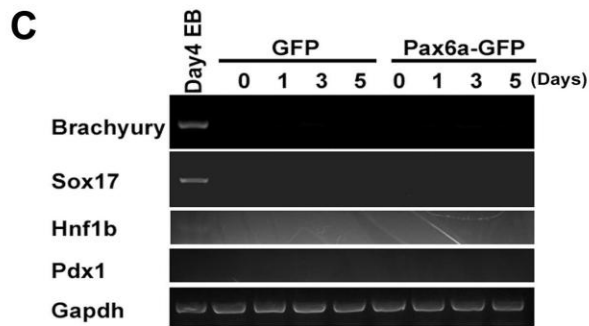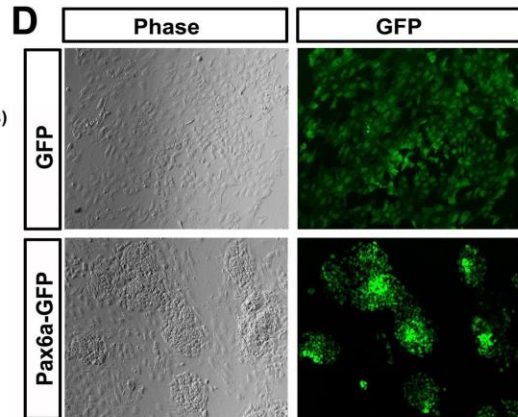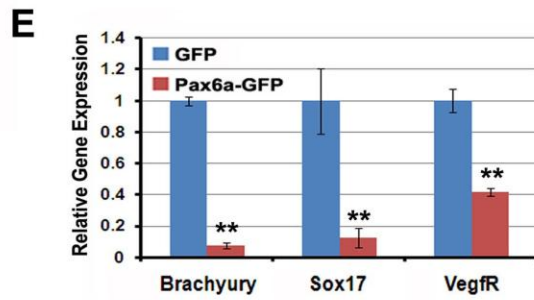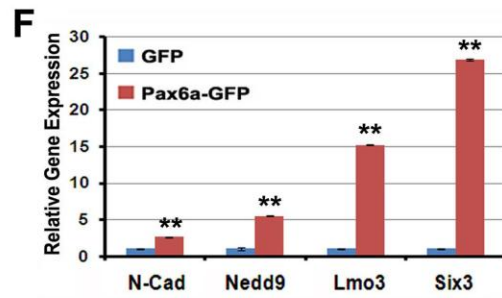

**Figure S5.** Overexpression of Pax6a converts human ESCs to NE, Related to Figure 6.

(A) Overexpression of Pax6a-GFP in hESCs does not induce expression of *FoxG1*, *En1*, *Hoxb4* or *Nkx2.1*, representative genes for forebrain, midbrain, spinal cord or ventral telencephalon, respectively. This suggests that Pax6a converts hESCs to primitive NE but not regional progenitors.

(B) Overexpression of Pax6a does not induce retinal gene expression, however, hESCs, after 70 days of differentiation (Meyer et al., 2009), now expressed retinal genes.

(C) Pax6a overexpressing cells do not express mesodermal, endodermal and pancreatic makers.

(D) Pax6a drives hESCs into NE even under mesoendodermal differentiation conditions. Inducible Pax6a-GFP hESCs were plated on matrigel and treated with doxycycline overnight to induce Pax6a-GFP expression. Cells were then grown in RPMI medium containing 100ng/ml activin A and 5 $\mu$ M Bio (GSK3 inhibitor to mimic Wnt signaling) for 24 hours followed by culturing in 2% FBS/RPMI to initiate mesoendodermal differentiation (Kroon et al., 2008). Under a fluorescent microscope, Pax6a-GFP cells still aggregate and form rosettes.

(E) qRT-PCR analysis revealed that Pax6a-GFP expression inhibits mesoendodermal gene expression induced by activin A and Bio. \*\*,  $p < 0.01$  vs GFP control.

(F) Pax6a-GFP overexpression increases NE genes even under the conditions that favor mesoendoderm differentiation. \*\*,  $p < 0.01$  vs GFP control.



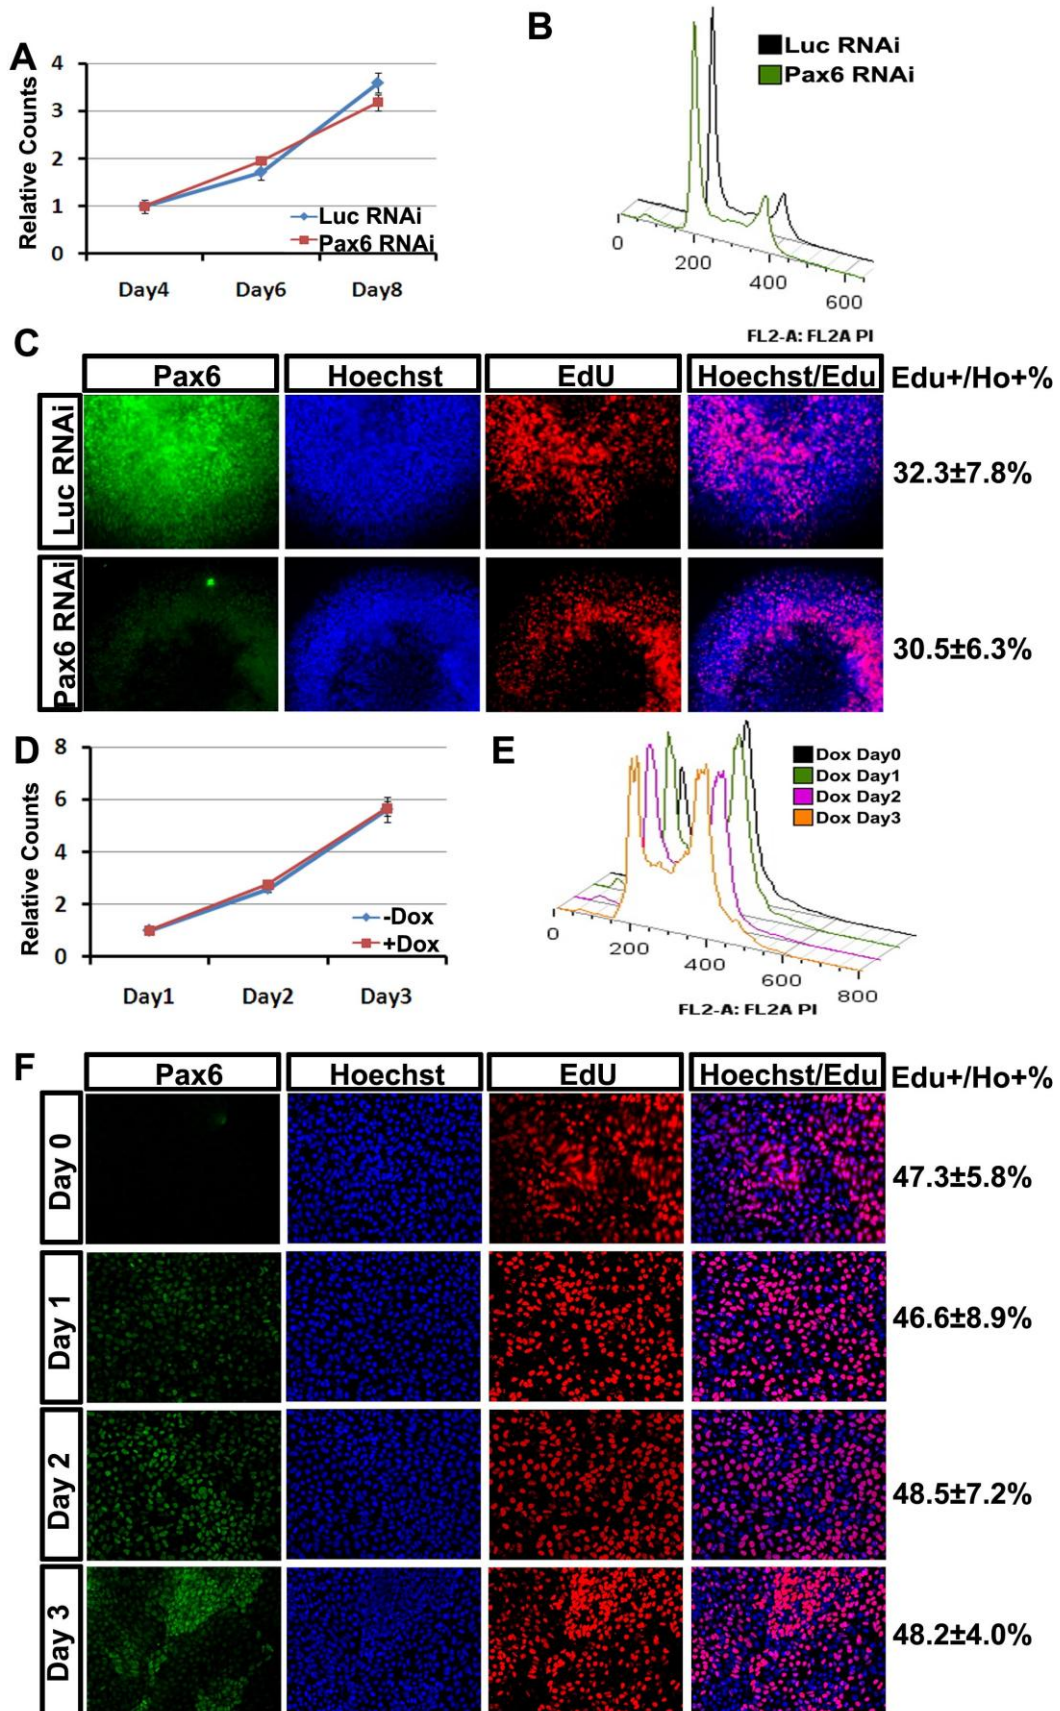

**Figure S6.** Overexpression or knockdown of Pax6 does not have biased proliferation or cell death, Related to Figure 7.

(A) Growth curves for Luc RNAi or Pax6 RNAi human ESCs during NE differentiation.

(B) Cell cycle comparison between Luc RNAi and Pax6 RNAi human ESCs after 8 days of differentiation. Knockdown of Pax6 does not obviously cause cell death. Left peak, G1 phase; Right peak, G2 phase.

(C) Luc RNAi and Pax6 RNAi human ESCs show similar proliferation rate after 8 days of differentiation as analyzed by EdU incorporation.

(D) Growth curves for inducible Pax6a-GFP hESC line in the presence or absence of doxycycline.

(E) Doxycycline induced Pax6a-GFP overexpression does not obviously alter cell cycle parameters.

(F) Doxycycline induced Pax6a-GFP overexpression does not show accelerated cell proliferation.

Movie S1: Time lapse video recording of GFP inducible hESC line during doxycycline treatment, Related to Figure 6.

Movie S2: Time lapse video recording of Pax6a-GFP inducible hESC line during doxycycline treatment, Related to Figure 6.

**Zhang et al., Supplementary Table. 1, Related to Figure 2.**

List of most upregulated genes in control and Pax6-knockdown cells after 6 days of differentiation

| Gene Name                                              | Gene ID | Affimetrix ID | Gene Identifier | UG Cluster | Upregulated Ratio in Luc RNAi | Upregulated Ratio in Pax6 RNAi |
|--------------------------------------------------------|---------|---------------|-----------------|------------|-------------------------------|--------------------------------|
| Fibroblast growth factor 9                             | FGF9    | 206404_at     | NM_002010       | Hs.111     | 398.7                         | 178                            |
| Calpain 6                                              | CAPN6   | 202966_at     | NM_014289       | Hs.496593  | 201.6                         | 58.3                           |
| Sp8 transcription factor                               | SP8     | 237449_at     | BF447038        | Hs.195922  | 105.5                         | 29.1                           |
| Nuclear receptor subfamily 2, group F, member 1        | NR2F1   | 209505_at     | AI951185        | Hs.519445  | 82.46                         | 30.3                           |
| Dachshund homolog 1                                    | DACH1   | 228915_at     | AI650353        | Hs.129452  | 73.95                         | 15.4                           |
| Zinc finger protein 521                                | ZNF521  | 226676_at     | AK021452        | Hs.116935  | 71.52                         | 11.6                           |
| V-maf musculoaponeurotic fibrosarcoma oncogene homolog | MAF     | 209348_s_at   | AF055376        | Hs.134859  | 69.13                         | 35.9                           |
| Mitogen-activated protein kinase 10                    | MAPK10  | 204813_at     | NM_002753       | Hs.125503  | 68.72                         | 61.4                           |
| Paired box 6                                           | PAX6    | 235795_at     | AW088232        | Hs.591993  | 63.51                         | 1.94                           |
| GABA receptor                                          | GABRP   | 205044_at     | NM_014211       | Hs.26225   | 54.1                          | 26.4                           |
| Dual specificity phosphatase 6                         | DUSP6   | 208891_at     | BC003143        | Hs.298654  | 47.71                         | 13.6                           |
| Fibronectin leucine rich transmembrane protein 3       | FLRT3   | 219250_s_at   | NM_013281       | Hs.41296   | 44.3                          | 12.4                           |
| Four jointed box 1                                     | FJX1    | 219522_at     | NM_014344       | Hs.39384   | 44.19                         | 22.9                           |
| EPH receptor A4                                        | EPHA4   | 228948_at     | T15545          | Hs.371218  | 42.26                         | 16.5                           |
| Cadherin 2, type 1, N-cadherin (neuronal)              | N-CAD   | 203441_s_at   | NM_001792       | Hs.464829  | 41.87                         | 9.22                           |
| Growth arrest-specific 1                               | GAS1    | 204457_s_at   | NM_002048       | Hs.65029   | 35.7                          | 19.7                           |
| Microtubule-associated protein 2                       | MAP2    | 225540_at     | BF342661        | Hs.368281  | 35.07                         | 15.6                           |
| Frizzled-related protein                               | FRZB    | 203698_s_at   | NM_001463       | Hs.128453  | 31.09                         | 7.54                           |
| Ectodermal-neural cortex                               | ENC1    | 201341_at     | NM_003633       | Hs.104925  | 28.88                         | 2.5                            |
| Gremlin 1, cysteine knot superfamily, homolog          | GREM1   | 218469_at     | NM_013372       | Hs.40098   | 28.28                         | 6.59                           |
| Forkhead box G1                                        | FOXP1   | 206018_at     | NM_005249       | Hs.695962  | 27.46                         | 3.52                           |
| GATA binding 3                                         | GATA3   | 209604_s_at   | BC003070        | Hs.524134  | 21.92                         | 9.31                           |



|                                                       |        |             |           |           |       |      |
|-------------------------------------------------------|--------|-------------|-----------|-----------|-------|------|
| Hyaluronan and proteoglycan link protein 1            | HAPLN1 | 205523_at   | U43328    | Hs.591758 | 18.74 | 3.68 |
| LIM homeobox 2                                        | LHX2   | 206140_at   | NM_004789 | Hs.696425 | 17.89 | 2.74 |
| Dickkopf homolog 1 (Xenopus laevis)                   | DKK1   | 204602_at   | NM_012242 | Hs.40499  | 15.95 | 4.54 |
| Lix1 homolog                                          | LIX1   | 230865_at   | N29837    | Hs.656702 | 14.36 | 9.91 |
| Nuclear receptor subfamily 2, group F, member 2       | NR2F2  | 215073_s_at | AL554245  | Hs.701977 | 14.33 | 1.39 |
| LIM homeobox 5                                        | LHX5   | 208333_at   | NM_022363 | Hs.302029 | 14.27 | 3.65 |
| Spondin 1, extracellular matrix protein               | SPON1  | 209436_at   | AB018305  | Hs.705394 | 11.8  | 2.35 |
| Lumican                                               | LUM    | 201744_s_at | NM_002345 | Hs.406475 | 11.41 | 4.15 |
| SIX homeobox 3                                        | SIX3   | 206634_at   | NM_005413 | Hs.658847 | 11.24 | 2.95 |
| Wingless-type MMTV integration site family, member 5B | WNT5B  | 221029_s_at | NM_030775 | Hs.306051 | 10.82 | 4.73 |
| IGF binding protein 5                                 | IGFBP5 | 211959_at   | AW007532  | Hs.635441 | 10.56 | 6.4  |
| Retina and anterior neural fold homeobox              | RAX    | 208242_at   | NM_013435 | Hs.278957 | 10.28 | 5.76 |
| Zinc finger E-box binding homeobox 2                  | ZEB2   | 203603_s_at | NM_014795 | Hs.34871  | 9.825 | 5.9  |
| LIM domain only 3 (rhombotin-like 2)                  | LMO3   | 204424_s_at | AL050152  | Hs.504908 | 9.038 | 2.67 |
| SIX homeobox 6                                        | SIX6   | 207250_at   | NM_007374 | Hs.194756 | 9.02  | 4.42 |
| Transcription factor AP-2 alpha                       | TFAP2A | 204653_at   | BF343007  | Hs.519880 | 8.167 | 3.9  |
| Meis homeobox 1                                       | MEIS1  | 204069_at   | NM_002398 | Hs.526754 | 7.353 | 1.91 |
| Cell adhesion molecule 1                              | CADM1  | 209032_s_at | AF132811  | Hs.370510 | 6.953 | 1.53 |
| Collagen, type IV, alpha 6                            | COL4A6 | 211473_s_at | U04845    | Hs.145586 | 5.92  | 0.05 |
| Delta-like 1 homolog                                  | DLK1   | 209560_s_at | U15979    | Hs.533717 | 5.708 | 2.47 |
| Transmembrane protein 46                              | TMEM46 | 230493_at   | AW664964  | Hs.433791 | 5.173 | 1.9  |
| Cadherin 6, type 2, K-cadherin                        | CDH6   | 205532_s_at | AU151483  | Hs.171054 | 5.065 | 1.2  |
| Fibroblast growth factor 8                            | FGF8   | 208449_s_at | NM_006119 | Hs.57710  | 4.385 | 1.25 |
| Endothelial PAS domain protein 1                      | EPAS1  | 200878_at   | AF052094  | Hs.468410 | 3.892 | 0.13 |
| Fatty acid binding protein 7, brain                   | FABP7  | 205030_at   | NM_001446 | Hs.26770  | 3.761 | 1.72 |
| Meis homeobox 2                                       | MEIS2  | 207480_s_at | NM_020149 | Hs.510989 | 3.293 | 0.31 |

**Zhang et al., Supplementary Table. 2, Related to Figure 2.**

List of most downregulated genes in control and Pax6-knockdown cells after 6 days of differentiation

| Gene Name                                                                          | Gene ID  | Affimetrix ID | Gene Identifier | UG Cluster | Down-regulated Ratio in Luc RNAi | Down-regulated Ratio in Pax6 RNAi |
|------------------------------------------------------------------------------------|----------|---------------|-----------------|------------|----------------------------------|-----------------------------------|
| HL14 gene encoding beta-galactoside-binding lectin, 3 end, clone 2                 | -        | 216405_at     | M14087          | Hs.701974  | 95.72837                         | 68.22603                          |
| Left-right determination factor 1                                                  | LEFTY1   | 206268_at     | NM_020997       | Hs.656214  | 89.90803                         | 31.57958                          |
| CDNA FLJ12624 fis, clone NT2RM4001754                                              | -        | 216319_at     | AK022686        | Hs.636868  | 70.86941                         | 30.67316                          |
| Nanog homeobox                                                                     | NANOG    | 220184_at     | NM_024865       | Hs.661360  | 41.71951                         | 7.847929                          |
| Chemokine (C-X-C motif) ligand 5                                                   | CXCL5    | 214974_x_at   | AK026546        | Hs.89714   | 24.46746                         | 11.28631                          |
| Left-right determination factor 2                                                  | LEFTY2   | 206012_at     | NM_003240       | Hs.520187  | 22.41169                         | 10.57038                          |
| Metallothionein 1H                                                                 | MT1H     | 206461_x_at   | NM_005951       | Hs.438462  | 21.42105                         | 3.860621                          |
| Hairy/enhancer-of-split related with YRPW motif 2                                  | HEY2     | 219743_at     | NM_012259       | Hs.144287  | 21.24448                         | 3.07047                           |
| UDP-N-acetyl-alpha-D-galactosamine:polypeptide N-acetylgalactosaminyltransferase 3 | GALNT3   | 203397_s_at   | BF063271        | Hs.170986  | 19.08385                         | 2.537366                          |
| Teratocarcinoma-derived growth factor 1                                            | TDGF1    | 206286_s_at   | NM_003212       | Hs.385870  | 19.01562                         | 4.435166                          |
| Metallothionein 1 pseudogene 2                                                     | MT1P2    | 211456_x_at   | AF333388        | Hs.632513  | 15.04931                         | 3.652626                          |
| integral membrane protein 2A                                                       | -        | 202746_at     | AL021786        | -          | 14.72373                         | 8.572848                          |
| Chromosome 9 open reading frame 135                                                | C9orf135 | 243610_at     | AI768674        | Hs.444459  | 14.09766                         | 1.880157                          |
| Metallothionein 1X                                                                 | MT1X     | 208581_x_at   | NM_005952       | Hs.374950  | 13.19                            | 4.166887                          |
| Galanin prepropeptide                                                              | GAL      | 214240_at     | AL556409        | Hs.278959  | 13.13642                         | 6.820273                          |
| CDNA FLJ35259 fis, clone PROST2004251                                              | -        | 1559280_a_at  | AA483467        | Hs.105196  | 12.98873                         | 2.594648                          |

|                                                    |           |             |           |           |          |          |
|----------------------------------------------------|-----------|-------------|-----------|-----------|----------|----------|
| CDNA FLJ35153 fis, clone PLACE6010765              | -         | 226498_at   | AA149648  | Hs.700704 | 12.6494  | 5.031425 |
| B-cell CLL/lymphoma 11A                            | BCL11A    | 219497_s_at | NM_022893 | Hs.370549 | 12.07195 | 1.922503 |
| Phorbol-12-myristate-13-acetate-induced protein 1  | PMAIP1    | 204286_s_at | NM_021127 | Hs.96     | 11.94802 | 3.375307 |
| Metallothionein 1G                                 | MT1G      | 204745_x_at | NM_005950 | Hs.433391 | 11.27146 | 4.283678 |
| Homo sapiens cDNA FLJ10768 fis, clone NT2RP4000150 | -         | 224833_at   | BE218980  | -         | 11.23587 | 4.354258 |
| Chromosome 6 open reading frame 117                | C6orf117  | 227226_at   | AA418816  | Hs.370055 | 10.49588 | 4.005213 |
| Indoleamine-pyrrole 2,3 dioxygenase                | INDO      | 210029_at   | M34455    | Hs.840    | 10.42948 | 2.55164  |
| Homo sapiens metallothionein 1L (MT1L)             | -         | 204326_x_at | NM_002450 | -         | 10.2986  | 5.527771 |
| peptidylprolyl isomerase C                         | -         | 204517_at   | BE962749  | -         | 9.94312  | 3.302816 |
| Hypothetical protein (ORF1), clone 00275           | -         | 230195_at   | BF672169  | Hs.152129 | 9.09496  | 4.921882 |
| CD9 molecule                                       | CD9       | 201005_at   | NM_001769 | Hs.114286 | 8.408244 | 4.141272 |
| Actin, alpha 1, skeletal muscle                    | ACTA1     | 203872_at   | NM_001100 | Hs.1288   | 8.40739  | 5.517276 |
| Metallothionein 2A                                 | MT2A      | 212185_x_at | NM_005953 | Hs.647371 | 8.399238 | 3.941177 |
| Metallothionein 1E                                 | MT1E      | 212859_x_at | BF217861  | Hs.534330 | 7.607666 | 3.152202 |
| Transgelin                                         | TAGLN     | 205547_s_at | NM_003186 | Hs.632099 | 7.446828 | 4.015787 |
| Serpin peptidase inhibitor, clade B, member 9      | SERPIN B9 | 209723_at   | BC002538  | Hs.104879 | 6.975821 | 2.159885 |
| POU class 5 homeobox 1                             | POU5F1    | 208286_x_at | NM_002701 | Hs.249184 | 6.339634 | 2.893297 |
| POU class 6 homeobox 1                             | POU6F1    | 210265_x_at | AF268617  | Hs.646545 | 6.138216 | 3.016898 |
| Deleted in bladder cancer 1                        | DBC1      | 205818_at   | NM_014618 | Hs.532316 | 5.560314 | 2.455385 |
| BCL2-associated athanogene 2                       | BAG2      | 209406_at   | AF095192  | Hs.55220  | 5.147716 | 3.618565 |
| Secretoglobin, family 3A, member 2                 | SCGB3A 2  | 228782_at   | BG540454  | Hs.483765 | 5.081696 | 1.550533 |
| Homeobox C4                                        | HOXC4     | 206858_s_at | NM_004503 | Hs.549040 | 4.105078 | 1.875036 |
| Metallothionein 1F                                 | MT1F      | 213629_x_at | BF246115  | Hs.513626 | 4.060011 | 2.262267 |
| Embryonic stem cell related protein                | HESRG     | 231381_at   | BF223023  | Hs.652553 | 4.050482 | 2.438316 |
| Telomeric repeat binding factor 1                  | TERF1     | 203449_s_at | NM_017489 | Hs.442707 | 4.038736 | 2.252147 |
| Cell division cycle associated 7-like              | CDCA7L    | 225081_s_at | AK022955  | Hs.520245 | 3.507665 | 2.403946 |
| V-myc                                              | MYC       | 202431_s_at | NM_002467 | Hs.202453 | 2.764843 | 1.955703 |

## Supplementary References

- Aiba, K., Sharov, A.A., Carter, M.G., Foroni, C., Vescovi, A.L., and Ko, M.S. (2006). Defining a developmental path to neural fate by global expression profiling of mouse embryonic stem cells and adult neural stem/progenitor cells. *Stem Cells* 24, 889-895.
- Chambers, S.M., Fasano, C.A., Papapetrou, E.P., Tomishima, M., Sadelain, M., and Studer, L. (2009). Highly efficient neural conversion of human ES and iPS cells by dual inhibition of SMAD signaling. *Nat Biotechnol* 27, 275-280.
- Kroon, E., Martinson, L.A., Kadoya, K., Bang, A.G., Kelly, O.G., Eliazer, S., Young, H., Richardson, M., Smart, N.G., Cunningham, J., *et al.* (2008). Pancreatic endoderm derived from human embryonic stem cells generates glucose-responsive insulin-secreting cells in vivo. *Nat Biotechnol* 26, 443-452.
- Lavaute, T.M., Yoo, Y.D., Pankratz, M.T., Weick, J.P., Gerstner, J.R., and Zhang, S.C. (2009). Regulation of Neural Specification from Human Embryonic Stem Cells by BMP and FGF. *Stem Cells*.
- Li, X.J., Zhang, X., Johnson, M.A., Wang, Z.B., Lavaute, T., and Zhang, S.C. (2009). Coordination of sonic hedgehog and Wnt signaling determines ventral and dorsal telencephalic neuron types from human embryonic stem cells. *Development* 136, 4055-4063.
- Meyer, J.S., Shearer, R.L., Capowski, E.E., Wright, L.S., Wallace, K.A., McMillan, E.L., Zhang, S.C., and Gamm, D.M. (2009). Modeling early retinal development with human embryonic and induced pluripotent stem cells. *Proc Natl Acad Sci U S A* 106, 16698-16703.
- Pankratz, M.T., Li, X.J., Lavaute, T.M., Lyons, E.A., Chen, X., and Zhang, S.C. (2007). Directed neural differentiation of human embryonic stem cells via an obligated primitive anterior stage. *Stem Cells* 25, 1511-1520.
- Watanabe, K., Ueno, M., Kamiya, D., Nishiyama, A., Matsumura, M., Wataya, T., Takahashi, J.B., Nishikawa, S., Muguruma, K., and Sasai, Y. (2007). A ROCK inhibitor permits survival of dissociated human embryonic stem cells. *Nat Biotechnol* 25, 681-686.
- Weick, J.P., Austin Johnson, M., and Zhang, S.C. (2009). Developmental regulation of human embryonic stem cell-derived neurons by calcium entry via transient receptor potential channels. *Stem Cells* 27, 2906-2916.
- Xia, X., Ayala, M., Thiede, B.R., and Zhang, S.C. (2008). In vitro- and in vivo-induced transgene expression in human embryonic stem cells and derivatives. *Stem Cells* 26, 525-533.
- Xia, X., and Zhang, S.C. (2007). Genetic modification of human embryonic stem cells. *Biotechnol Genet Eng Rev* 24, 297-309.
- Xia, X., Zhang, Y., Zieth, C.R., and Zhang, S.C. (2007). Transgenes delivered by lentiviral vector are suppressed in human embryonic stem cells in a promoter-dependent manner. *Stem Cells Dev* 16, 167-176.
